# Supplementary material for: Asparagine-linked glycosylation is not directly coupled to protein translocation across the endoplasmic reticulum in Saccharomyces cerevisiae
Source: PubMed Central journal article supplement — Mol Biol Cell. 2019 Oct 1;30(21):2626–38. doi: 10.1091/mbc.E19-06-0330 (PMC6761772; doi:10.1091/mbc.e19-06-0330), 2019-10-01
Supplement: mbc-30-2626-s001.pdf [file mbc-30-2626-s001.pdf]

# Supplemental Materials

*Molecular Biology of the Cell*

Shrimal et al.

Table SI: Residues in the Sec61 complex that mediate contacts with the STT3A complex via DC2 in the mammalian ER, and with Sec63p in the yeast Sec complex.

| Sec61 $\alpha$ | Sec61 $\beta$ | Sec61 $\gamma$ | DC2  | Sec61p | Sbh1p | Sss1p | Sec63       |
|----------------|---------------|----------------|------|--------|-------|-------|-------------|
| K29            |               |                | F118 | N30    |       |       | W242        |
| L33            |               |                | L121 | I34    |       |       | W242        |
|                | S96           |                | G67  | K80    |       |       | -           |
|                |               | F53            | F92  | A67    |       |       | -           |
|                |               | L56            | F92  | L70    |       |       | L210 & F17  |
|                |               | P60            | M85  | P74    |       |       | V215 & L210 |
|                |               | N63            | P71  | Y77    |       |       | Y7 & V215   |
|                |               | G67            | R70  | -      |       |       |             |

Residues in Sec61p, Sbh1p and Sss1p were identified by sequence alignment. Due to a shorter protein sequence for Sss1p, G67 in Sec61 $\gamma$  does not align with a Sss1p residue (NAR). Sec61p residue A67 and Sbh1p residue K80 do not contact Sec63p.
